# Supplementary material
Source: PubMed Central journal article supplement (PMC9561030)
Supplement: NIHMS1834571-supplement-Supplementary_Figures___Tables.pdf [file NIHMS1834571-supplement-Supplementary_Figures___Tables.pdf]

**Figure S1**

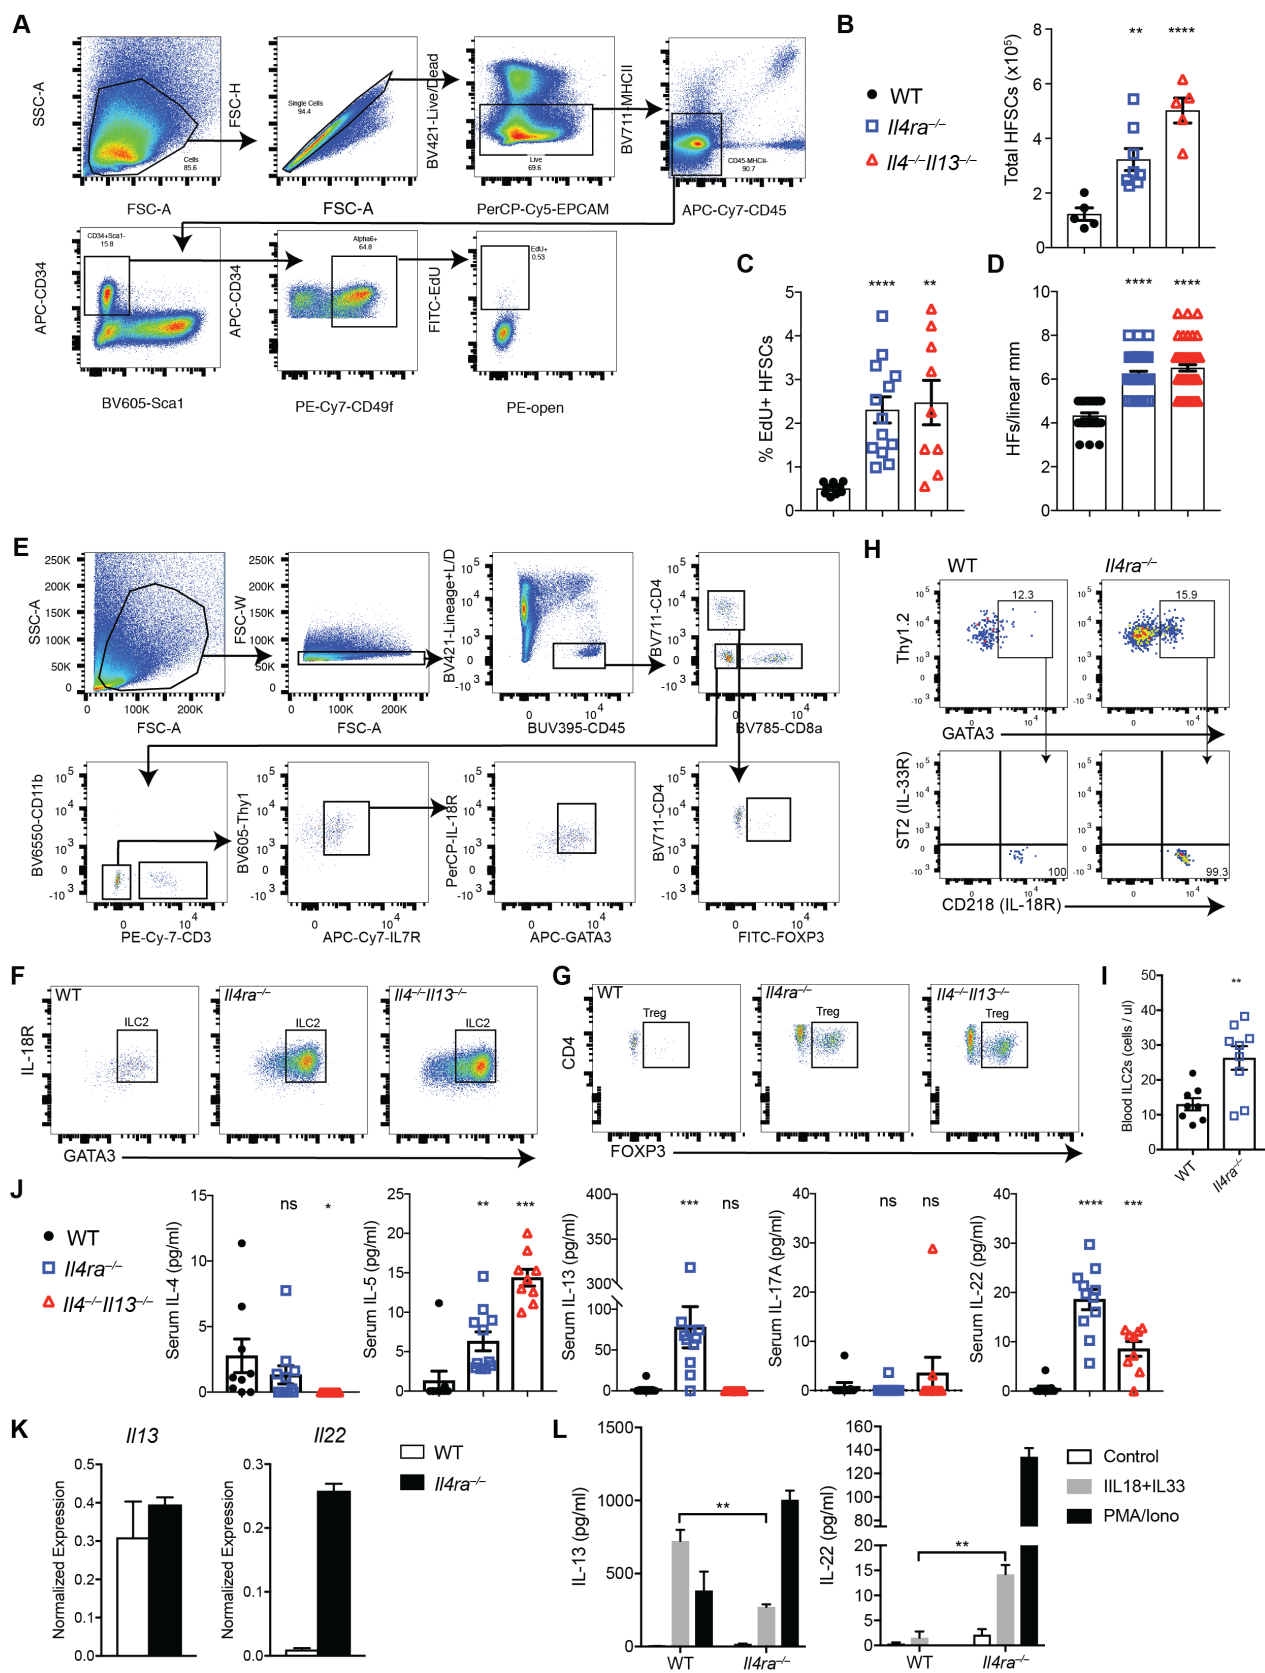

**Figure S1. Type 2 immune-deficient strains have an increased *Demodex* burden and expansion of skin ILC2s with extrusion into the circulation, related to Figure 1.**

(A) Gating strategy for hair follicle stem cells (HFSCs). (B) Number of HFSCs by flow cytometry. (C) Percent EdU<sup>+</sup> HFSCs by flow cytometry. (D) Quantification of visualized hair follicles per 1mm of skin. (E) Gating strategy for skin cell populations using various mouse strains. (F) Flow cytometry of skin ILC2s (CD45<sup>+</sup>Lin<sup>-</sup>Thy1<sup>+</sup>IL-7R<sup>+</sup>GATA3<sup>+</sup>) in 8-12 weeks old WT, *Il4ra*<sup>-/-</sup>, and *Il4*<sup>-/-</sup>, *Il13*<sup>-/-</sup> mice at homeostasis. (G) Flow cytometry of skin T regulatory (Treg) cells ((CD3<sup>+</sup>CD4<sup>+</sup>FoxP3<sup>+</sup>) in 8-12-week-old WT, *Il4ra*<sup>-/-</sup>, and *Il4*<sup>-/-</sup>, *Il13*<sup>-/-</sup> mice at homeostasis. (H) Flow cytometry plot for blood ILC2s (gated CD45<sup>+</sup>Lin<sup>-</sup>Thy1<sup>+</sup>GATA3<sup>+</sup>) in WT or *Demodex*-infested *Il4ra*<sup>-/-</sup> mice. Expression of ST2 (IL-33R) and IL-18R in gated ILC2s as indicated. (I) Frequency of blood ILC2s in WT or *Demodex*-infested *Il4ra*<sup>-/-</sup> mice. (J) Serum IL-4, IL-5, IL-13, IL-17A, IL-22 in WT and *Demodex*-infested *Il4ra*<sup>-/-</sup> and *Il4*<sup>-/-</sup>, *Il13*<sup>-/-</sup> mice. (K) QPCR analyses of *Il13* and *Il22* expression in sorted skin ILC2s from *Demodex*-infested WT and *Il4ra*<sup>-/-</sup> mice. (L) IL-13 and IL-22 in supernatant of sorted skin ILC2s from *Demodex*-infested WT and *Il4ra*<sup>-/-</sup> mice cultured with IL-7+TSLP (Control); IL-7+TSLP+IL-18+IL-133 (IL-18+IL-33) or IL-7+TSLP+PMA/Ionomycin (PMA/Iono). Data presented as mean ± s.e.m. Data are from one representative experiment (B, K, L) of at least two independent experiments, or pooled from multiple independent experiments (C, D, I, J). \* P < 0.05, \*\* P < 0.01, \*\*\* P < 0.001, \*\*\*\* P < 0.0001 by two-tailed Student's t test.

**Figure S2**

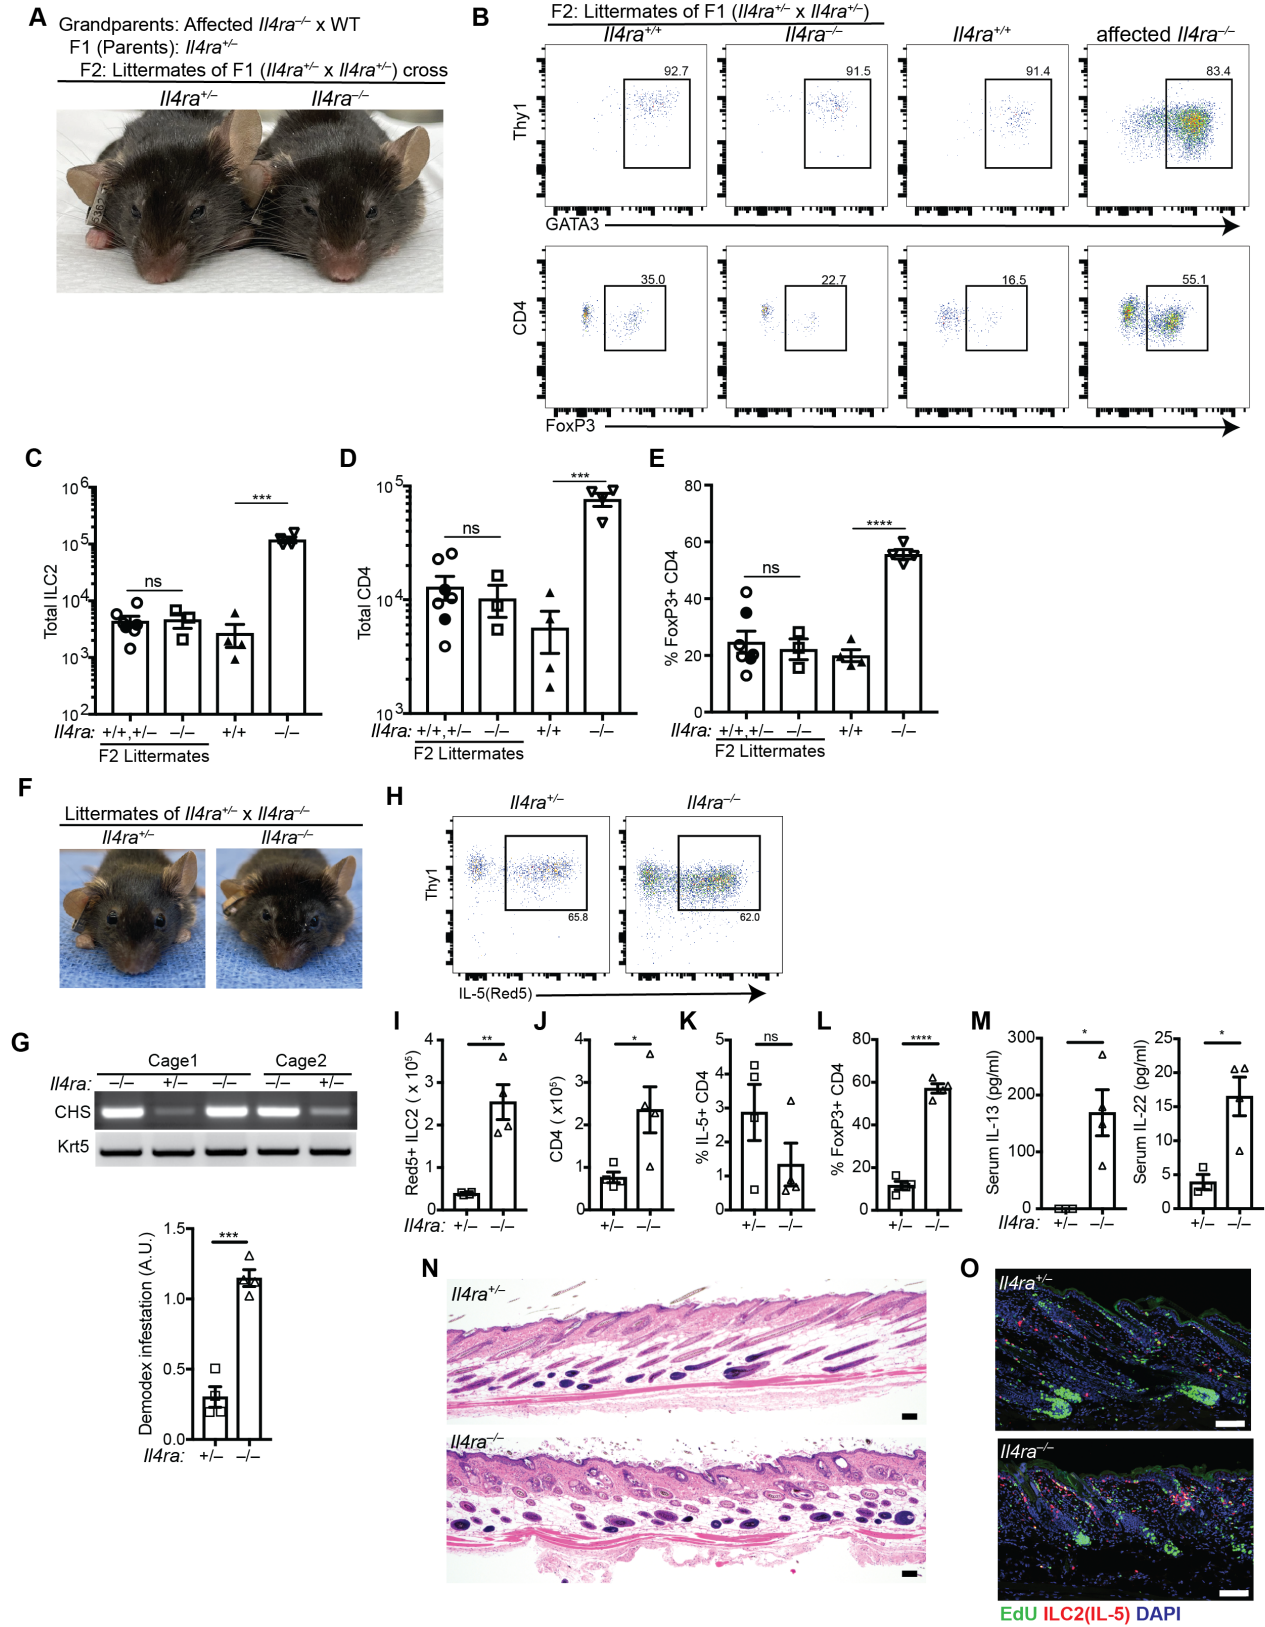

**Figure S2. Mice with intact type 2 immunity do not show the altered skin phenotype associated with *Demodex* infection, related to Figure 3.**

(A) Representative pictures of *Il4ra*<sup>+/+</sup> and *Il4ra*<sup>-/-</sup> F2 mice generated from F1 intercross of *Il4ra*<sup>+/-</sup> parent mice. The F1 *Il4ra*<sup>+/-</sup> mice were derived by crossing unaffected WT x affected *Il4ra*<sup>-/-</sup> grandparents. (B) Flow cytometry plots of ILC2s (top, gated CD45<sup>+</sup>Lin<sup>-</sup>CD3<sup>-</sup>CD4<sup>-</sup>Thy1<sup>+</sup>IL7R<sup>+</sup>) or CD4 (bottom, gated CD45<sup>+</sup>CD3<sup>+</sup>CD4<sup>+</sup>) from F2 *Il4ra*<sup>+/+</sup>, and *Il4ra*<sup>-/-</sup> mice generated from F1 *Il4ra*<sup>+/-</sup> intercross or age matched WT and affected *Il4ra*<sup>-/-</sup> experimental groups. (C to E) Quantification of ILC2 (C), CD4 (D), and frequency of Treg cells (E). In the *Il4ra*<sup>+/+</sup>, and *Il4ra*<sup>+/-</sup> experimental group, closed circles represent WT mice and open circles represent heterozygous mice. (F) Representative pictures of *Il4ra*<sup>+/-</sup>, *Il5*<sup>Red5</sup> and *Il4ra*<sup>-/-</sup>, *Il5*<sup>Red5</sup> littermates generated from visually unaffected *Il4ra*<sup>+/-</sup> x affected *Il4ra*<sup>-/-</sup> mice. The F1 *Il4ra*<sup>+/-</sup> mice were derived by crossing unaffected WT x affected *Il4ra*<sup>-/-</sup> parents. (G) PCR for *Demodex* chitinase synthase gene (CHS) or genomic DNA for the keratin 5 gene (Krt5) from back skin. Quantification of relative *Demodex* infestation for PCR is shown below. (H) Flow cytometry plots of Red5<sup>+</sup> ILC2s (pre-gated on Live CD45<sup>+</sup>Lin<sup>-</sup>Thy1<sup>+</sup>) from littermate *Il4ra*<sup>+/-</sup> and *Il4ra*<sup>-/-</sup> mice. (I to L) Quantification of Red5<sup>+</sup> ILC2s (I), total CD4 (J), frequency of IL-5<sup>+</sup>(Red5<sup>+</sup>) CD4 T cells in skin (K) and frequency of Treg cells (CD3<sup>+</sup>CD4<sup>+</sup>FoxP3<sup>+</sup>) in skin (L). (M) Serum IL-13 and IL-22 from littermate *Il4ra*<sup>+/-</sup> and *Il4ra*<sup>-/-</sup> mice. (N) Skin sections stained with H&E. Scale bar, 100 μm. (O) Back skin sections were stained with EdU (green), anti-tdTomato (red, highlighting IL-5<sup>+</sup> cells), and DAPI (blue). Scale bar, 100 μm. Data presented as mean ± s.e.m and representative of two independent experiments. Statistical significance shown by \* P < 0.05, \*\* P < 0.01, \*\*\* P < 0.001, \*\*\*\* P < 0.0001 by one-way ANOVA (C-E) or two-tailed Student's t test (H-L). ns, not significant.

**Figure S3**

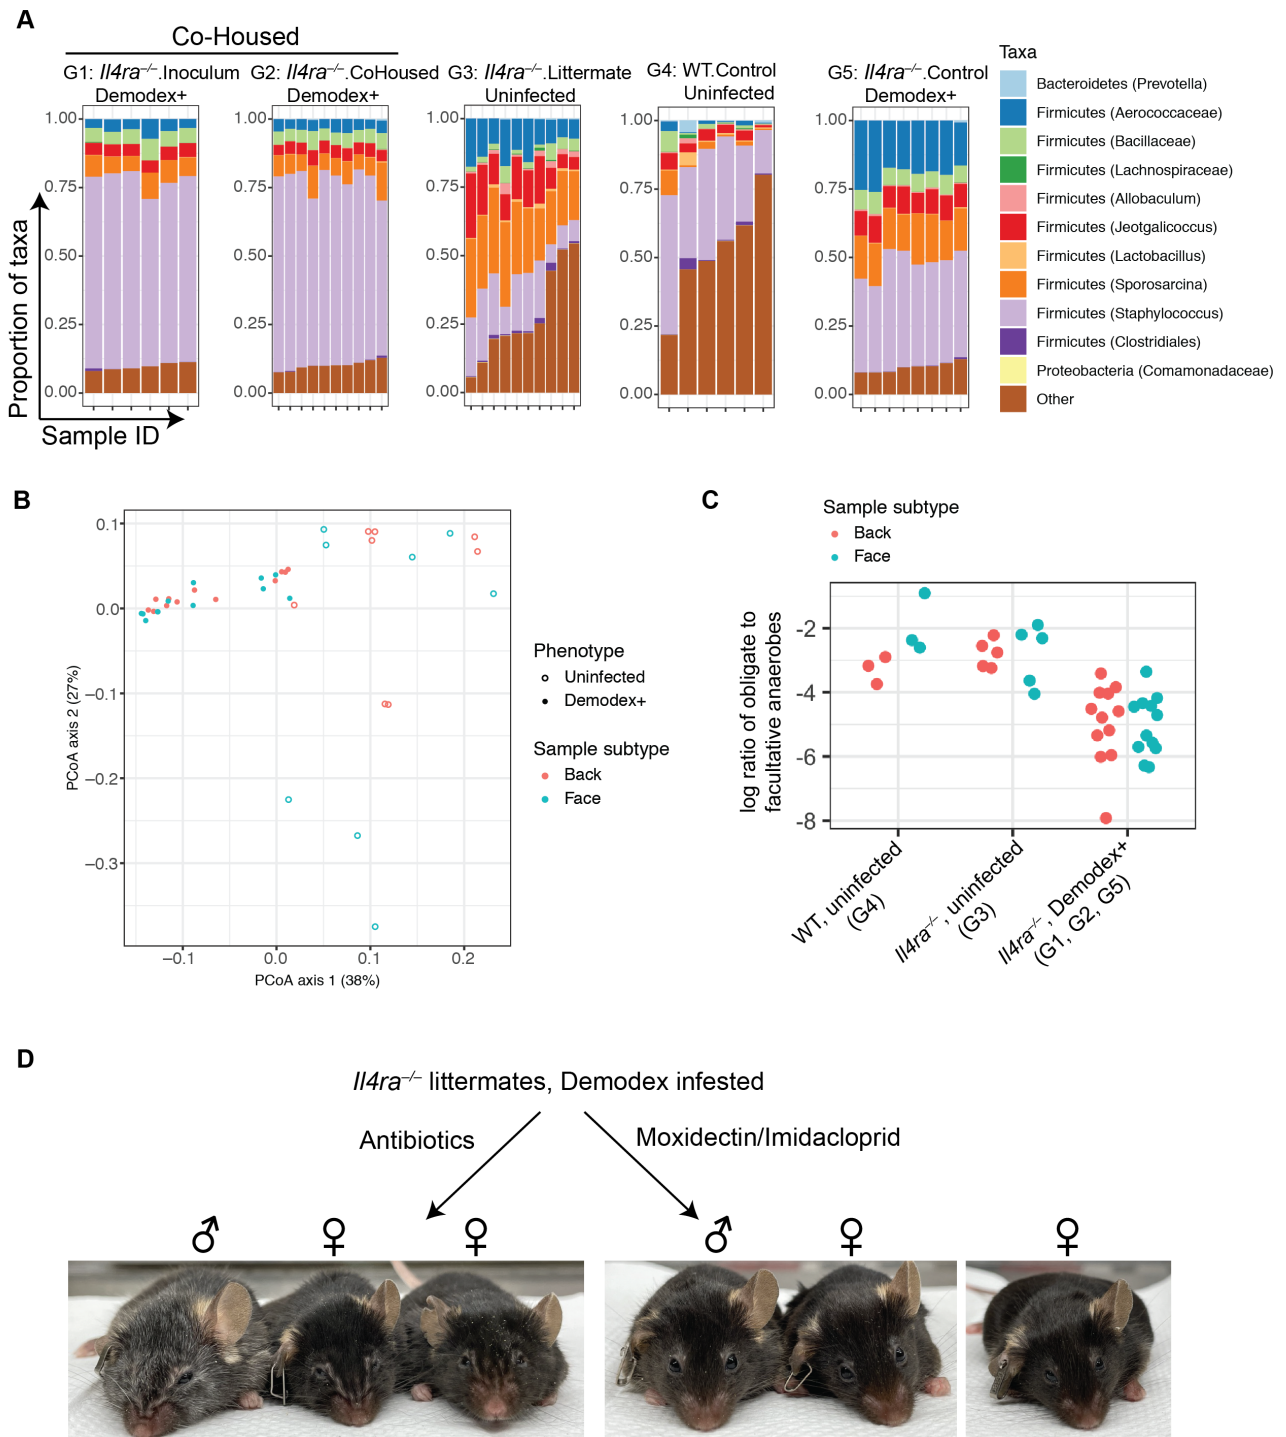

**Figure S3. 16S ribosomal RNA gene sequencing analysis of uninfected and *Demodex*-infected mice, related to Figure 3.**

(A) Compositional plots of the top 10 major taxa present in each sample of the co-housing experiment shown in Figure 3. Bacterial lineages are color coded and presented as stacked bar graphs. (B) PCoA plot based on the Bray-Curtis dissimilarity assessed using the microbiome data.

All samples were used to make a common plot. Samples were further classified by gross skin phenotype (uninfected, open circles; *Demodex*-infected (Demodex+), closed circles). The color of the symbol indicates the sampling site. **(C)** Ratio of obligate to facultative anaerobes abundance in uninfected and Demodex+ mice. **(D)** 8 week old, *Demodex*-infested *Il4ra*<sup>-/-</sup> littermates were separated and treated with broad spectrum antibiotics for 1 month in the drinking water or topically with Moxidectin and Imidacloprid weekly for 8 weeks.

**Figure S4**

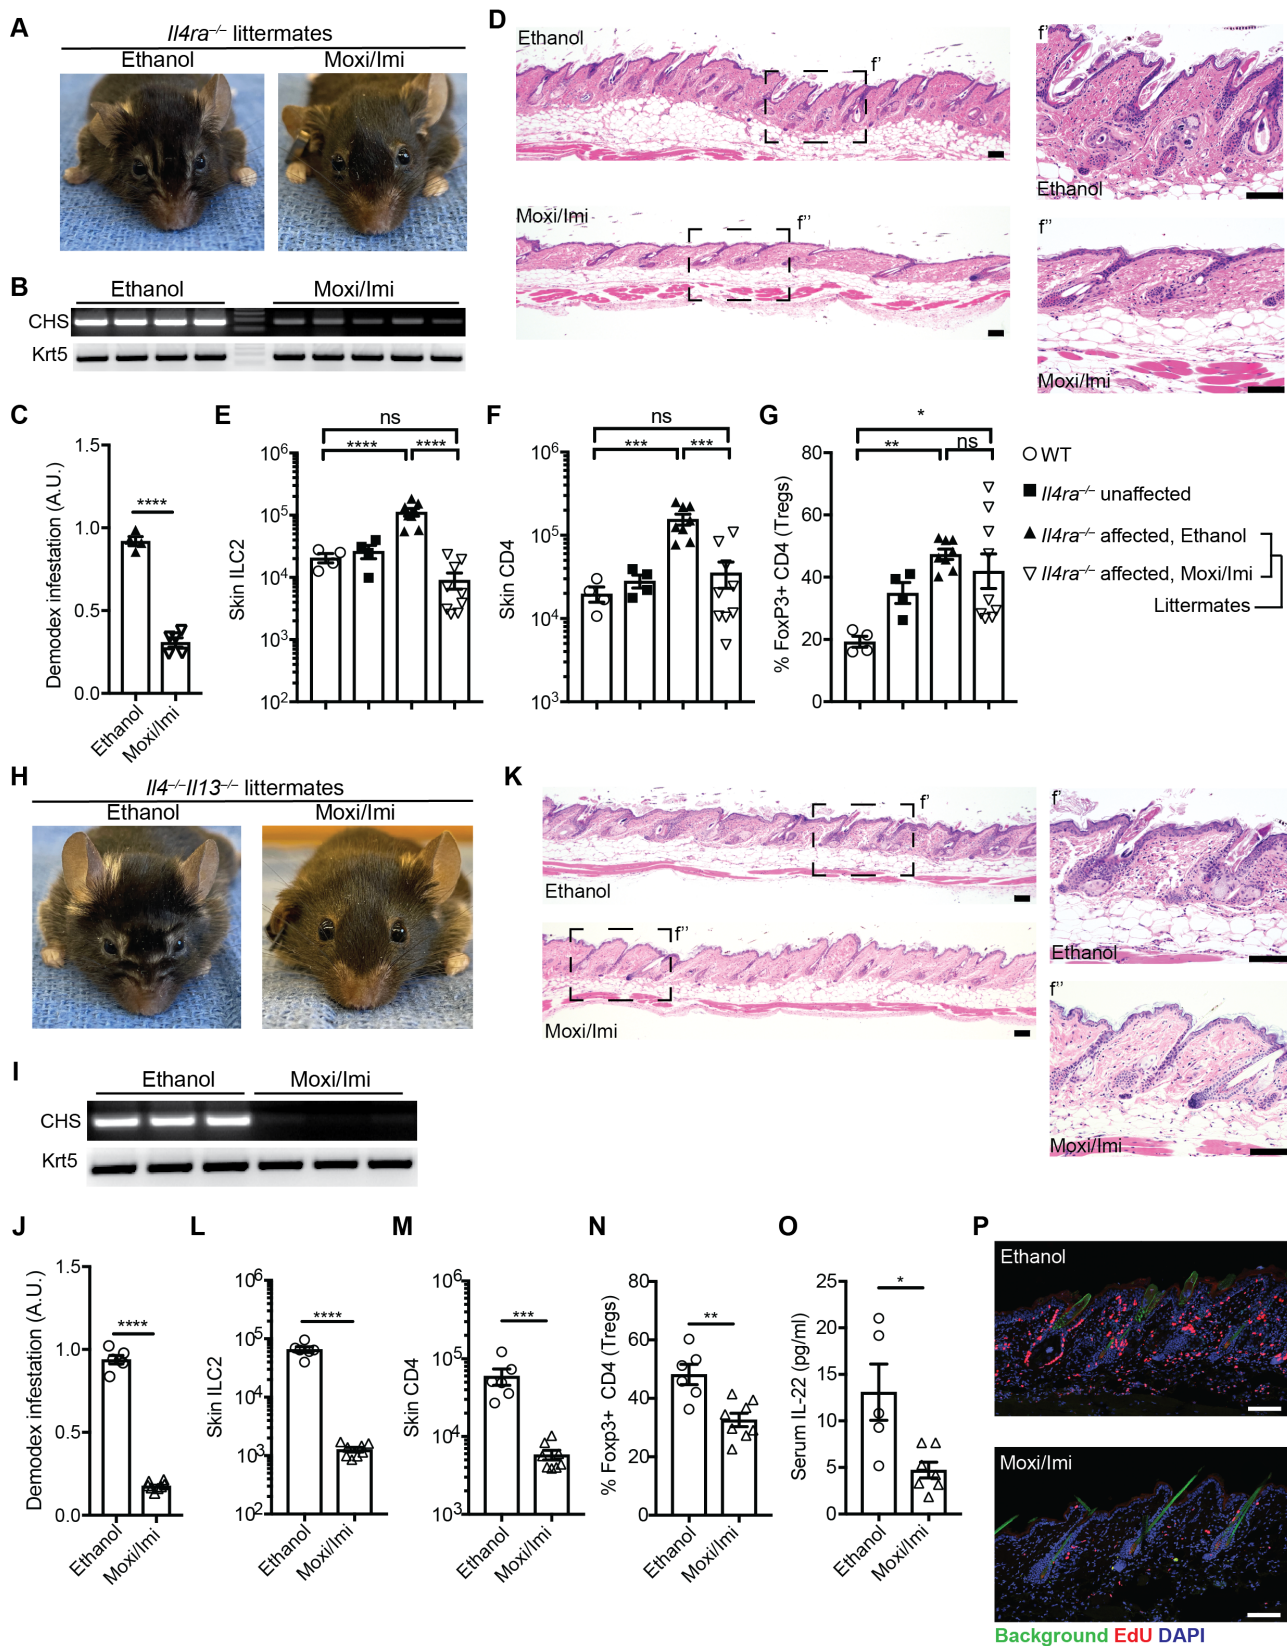

**Figure S4. Targeted therapy prevents the phenotype in *Demodex*-infested type 2 immunodeficient mice, related to Figure 3.**

(A) *Demodex*-infested *Il4ra*<sup>-/-</sup> littermates that were separated and treated with Ethanol (vehicle control) or Moxidectin and Imidacloprid mixture (Moxi/Imi) once a week for 8 weeks. (B) PCR for *Demodex* chitin synthase gene (CHS, top) or genomic DNA for the Keratin gene (Krt5, bottom) in Ethanol- or Moxi/Imi-treated mice. Each lane represents an individual mouse. (C) Quantification of relative band intensity (CHS/Krt5) for the PCR in (B). (D) Sections from back skin of Ethanol- or Moxi/Imi-treated mice were stained with H&E. Scale bar, 100  $\mu$ m. (E–G) Quantification of skin ILC2 (D), CD4 (E), and frequencies of Treg cells in skin (F) from control WT, or unaffected *Il4ra*<sup>-/-</sup> or from *Demodex*-infested *Il4ra*<sup>-/-</sup> littermates that were treated with Ethanol or Moxi/Imi. (H) Representative pictures of *Il4*<sup>-/-</sup>, *Il13*<sup>-/-</sup> mice. Littermates of known *Demodex* infested *Il4*<sup>-/-</sup>, *Il13*<sup>-/-</sup> were separated at 3-6 weeks of age and treated with topical Ethanol or Moxi/Imi once a week for 8 weeks. (I) PCR for *Demodex* chitinase synthase gene (CHS) or genomic DNA for the keratin 5 gene (Krt5) from back skin. (J) Quantification of relative band intensity (CHS/Krt5) for the PCR in (I). (K) Sections from back skin of *Il4*<sup>-/-</sup>, *Il13*<sup>-/-</sup> Ethanol- or Moxi/Imi-treated mice were stained with H&E. Scale bar, 100  $\mu$ m. (L–N) Quantification of ILC2s (J), CD4s (K), and frequency of Treg cells (J) in *Il4*<sup>-/-</sup>, *Il13*<sup>-/-</sup> mice treated with Ethanol or Moxi/Imi for 8 weeks. (O) Serum IL-22. (P) Sections from back skin of *Il4*<sup>-/-</sup>, *Il13*<sup>-/-</sup> Ethanol- or Moxi/Imi-treated mice were stained for EdU (red) and DAPI (blue). Scale bar, 100  $\mu$ m. Data presented as mean  $\pm$  s.e.m and pooled from two independent experiments. Statistical significance shown by \* P < 0.05, \*\* P < 0.01, \*\*\* P < 0.001, \*\*\*\* P < 0.0001 by one-way ANOVA (C, E-G) or two-tailed Student's t test (J-O). ns, not significant.

**Figure S5**

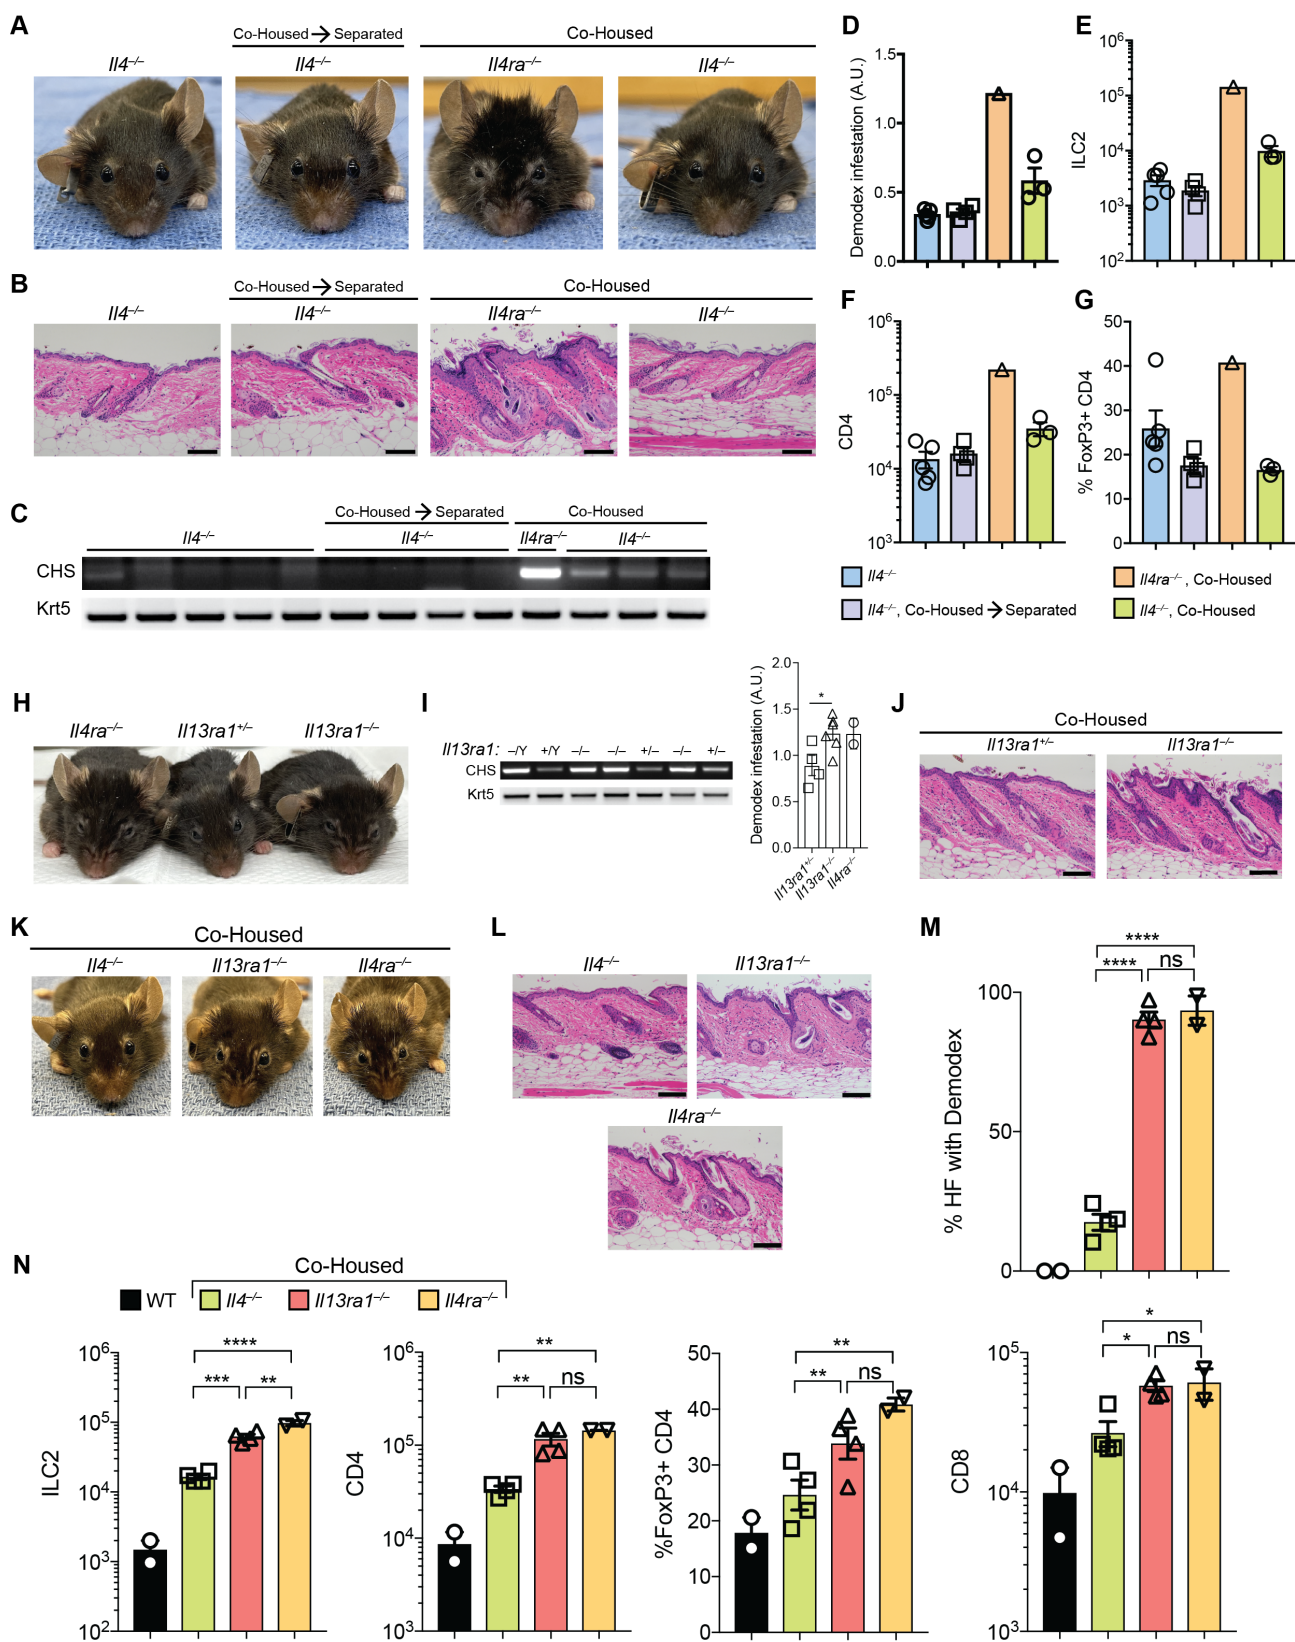

**Figure S5. Susceptibility to *Demodex* infection is dependent on IL-13Ra1 but not IL-4 deficiency, related to Figure 4.**

(A) Representative uninfected *Il4*<sup>-/-</sup>, *Il4*<sup>-/-</sup> co-housed with *Demodex*-infested *Il4ra*<sup>-/-</sup> mice for 8 weeks then separated for 8 weeks, or co-housed *Il4*<sup>-/-</sup> mice with *Demodex*-infested *Il4ra*<sup>-/-</sup> for 12 weeks. (B) Skin sections, as in (A) stained for H&E. Scale bar, 100  $\mu$ m. (C) PCR for *Demodex* chitinase synthase gene (CHS, top) or genomic DNA for the keratin 5 gene (Krt5, bottom) from back skin. (D) Quantification of relative *Demodex* infestation by PCR in (C). (E to G) Number of skin ILC2s (E), CD4 (F), and frequency of Treg cells (G) (as percentage of total CD4) in back skin. (H) Representative co-housed *Demodex*-infested *Il4ra*<sup>-/-</sup>, *Il13ra1*<sup>+/-</sup> and *Il13ra1*<sup>-/-</sup> mice. (I) PCR for *Demodex* chitinase synthase gene (CHS, top) or genomic DNA for the keratin 5 gene (Krt5, bottom) from back skin and quantification of relative *Demodex* infestation (right). (J) Skin sections stained for H&E from *Demodex*-infested *Il13ra1*<sup>+/-</sup> and *Il13ra1*<sup>-/-</sup> mice. Scale bar, 100  $\mu$ m. (K) Representative co-housed *Il4*<sup>-/-</sup>, *Il13ra1*<sup>-/-</sup> and *Il4ra*<sup>-/-</sup> mice. (L) Skin sections stained for H&E from mice as in (K). Scale bar, 100  $\mu$ m. (M) Quantification of proportion of HF visually infested by *Demodex* mites. (N) Number of skin ILC2s, CD4, frequency of Treg cells (as percentage of total CD4), and CD8 in back skin. Data presented as mean  $\pm$  s.e.m and representative of two independent experiments. Statistical significance shown by \*  $P < 0.05$ , \*\*  $P < 0.01$ , \*\*\*  $P < 0.001$ , \*\*\*\*  $P < 0.0001$  by one-way ANOVA. ns, not significant.

**Figure S6**

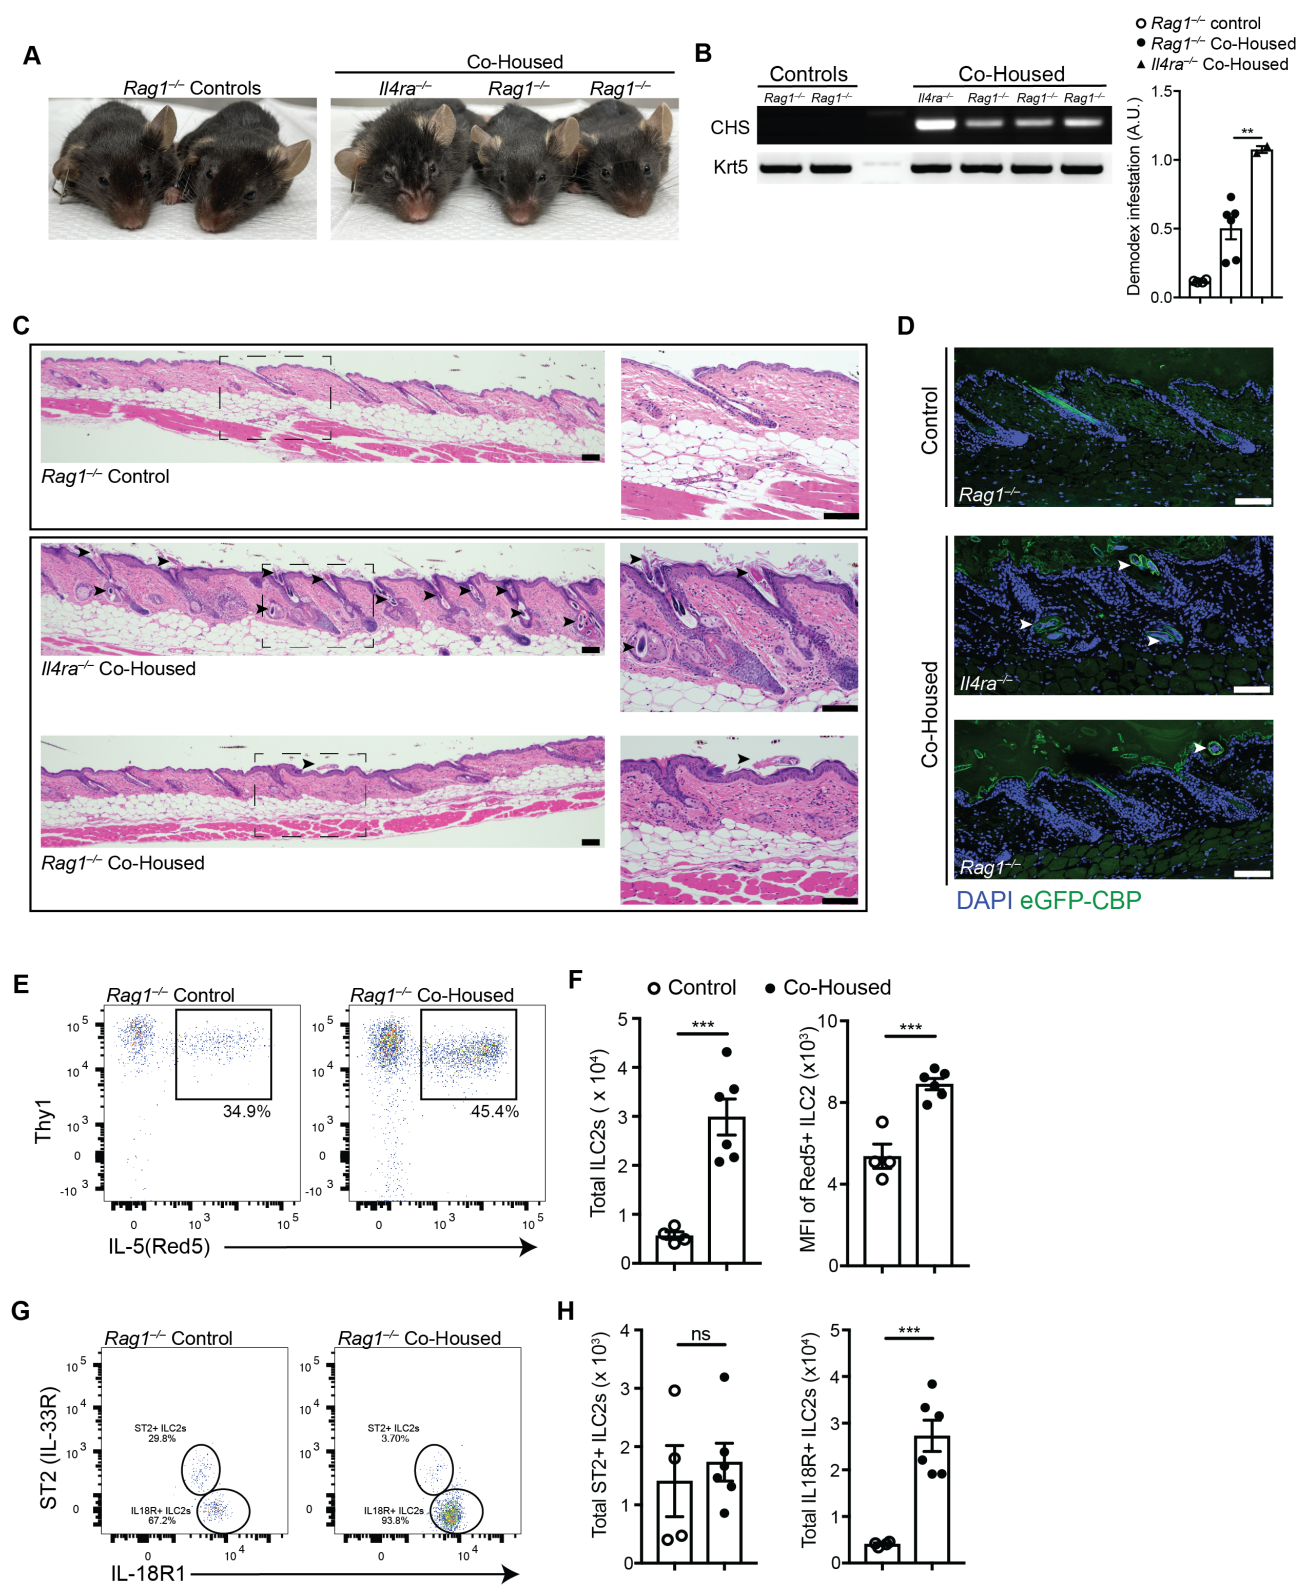

**Figure S6. ILC-sufficient mice are protected from high-burden *Demodex* infection, related to Figure 5.**

(A) Representative images of *RagI*<sup>-/-</sup>, *Il5*<sup>Red5/Red5</sup> littermates that were maintained by themselves (Control) or Co-Housed with *Demodex*-infested *Il4ra*<sup>-/-</sup> mice (Co-Housed) for 8 weeks. (B) PCR for *Demodex* chitin synthase gene (CHS, top) or genomic DNA for the keratin 5 gene (Krt5, bottom) from back skin and quantification of relative *Demodex* infestation (right). (C) Skin sections from *RagI*<sup>-/-</sup>, *Il5*<sup>Red5/Red5</sup> control mice and *Demodex*-infested *Il4ra*<sup>-/-</sup> mice co-housed with *RagI*<sup>-/-</sup>, *Il5*<sup>Red5/Red5</sup> mice were stained with H&E. (D) Skin sections as in (C), stained for chitin (green, eGFP-CBP) and DAPI (blue). Arrowheads highlight *Demodex* mites. All scale bars, 100 μm. (E) Flow cytometry plots of Red5<sup>+</sup> ILC2s (pre-gated on Live CD45<sup>+</sup>Lin<sup>-</sup>Thy1<sup>+</sup>) from *RagI*<sup>-/-</sup>, *Il5*<sup>Red5/Red5</sup> (control) or *RagI*<sup>-/-</sup>, *Il5*<sup>Red5/Red5</sup> that were co-housed with *Demodex*-infested *Il4ra*<sup>-/-</sup> mice (Co-Housed). (F) Quantification of the number of Red5<sup>+</sup> ILC2s (left), and mean fluorescence intensity (MFI) of Red5<sup>+</sup> ILC2s (right) in skin. (G) Flow cytometry plots showing ST2 (IL-33R) and IL-18R expression by skin ILC2s (pre-gated on Live CD45<sup>+</sup>Lin<sup>-</sup>Thy1<sup>+</sup>Red5<sup>+</sup>) from *RagI*<sup>-/-</sup>, *Il5*<sup>Red5/Red5</sup> (control) or *RagI*<sup>-/-</sup>, *Il5*<sup>Red5/Red5</sup> that were co-housed with *Il4ra*<sup>-/-</sup> mice (Co-Housed). (H) Quantification of the total of ST2<sup>+</sup> (left) or IL-18R<sup>+</sup> (right) Red5<sup>+</sup> ILC2s in full thickness back skin. Data presented as mean ± s.e.m and pooled from 2 independent cohorts. Statistical significance shown by \*\*\* P < 0.001 by two-tailed Student's t test. ns, not significant.

**Figure S7**

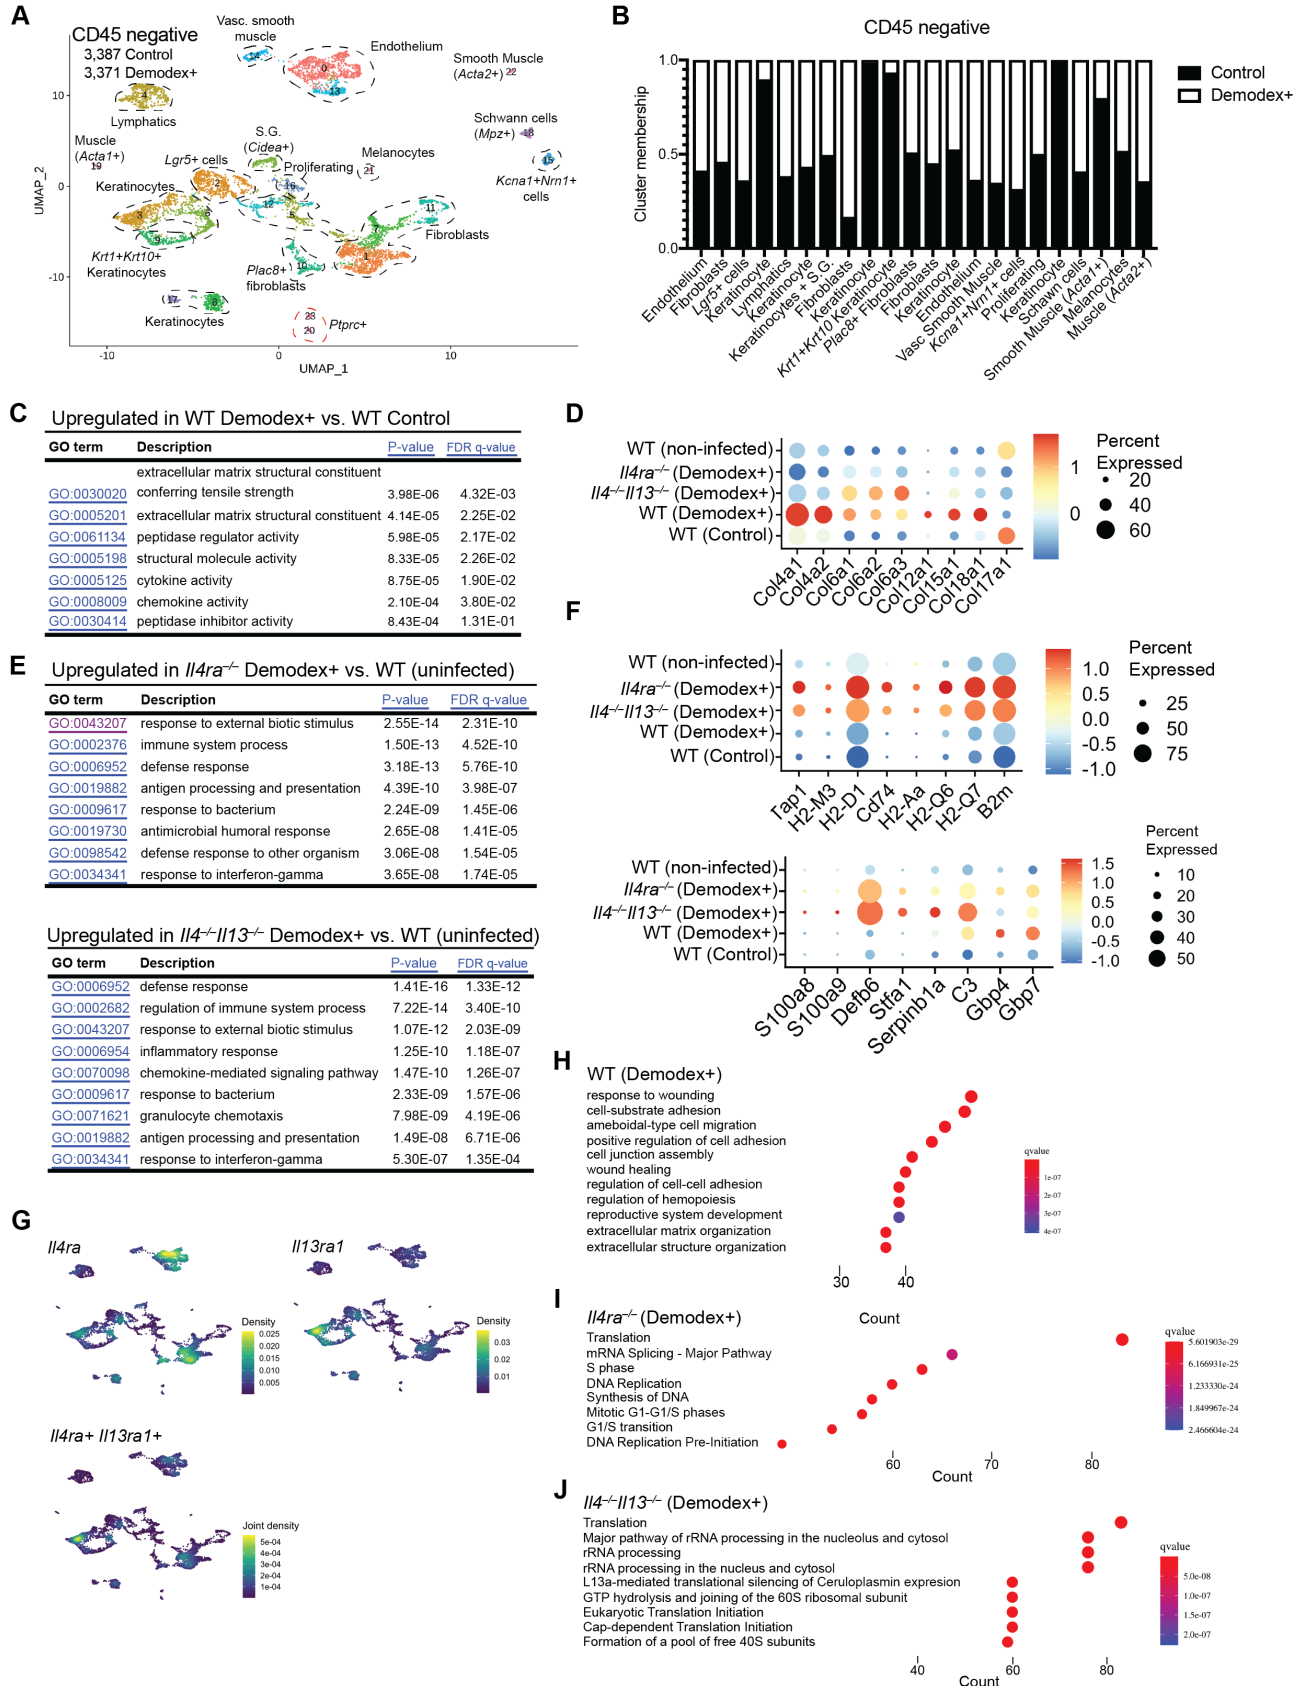

**Figure S7. scRNA-seq of *Demodex*-infected mice reveal a divergent tissue response in WT and type 2 immunodeficient mice, related to Figure 6.**

(A) UMAP projection of the CD45<sup>+</sup> cells from skin of WT control and *Demodex*-infected mice. (B) Bar plot showing the percentage of cells in (A) for each cluster by experimental condition. S.G., sebaceous glands. (C) Gene Ontology (GO) analyses for biological processes upregulated across all CD45<sup>+</sup> cells in *Demodex*-infected WT mice vs. WT control. (D) Dot plot of representative genes associated with GO term related to tensile strength. (E) Gene Ontology (GO) analyses for biological processes upregulated across all CD45<sup>+</sup> cells in *Demodex*-infected *Il4ra*<sup>-/-</sup> (top) and *Il4*<sup>-/-</sup>, *Il13*<sup>-/-</sup> (bottom) *Demodex*-infected mice vs. WT (non-infected) control. (F) Dot plot of representative genes associated with antigen presentation and anti-microbial response. (G) Density plot showing expression of *Il4ra*, *Il13ra1* or joint *Il4ra* and *Il13ra1* by CD45<sup>+</sup> cells (UMAP as in A). (H–J) GO biological processes upregulated in stem cells in WT (H), IL-4Ra<sup>-/-</sup> (I), or *Il4*<sup>-/-</sup>, *Il13*<sup>-/-</sup> (J) *Demodex*-infested skin (I) vs. WT (non-infected) control.

**Table S1. Identification of *Demodex muscui*, related to Figure 1.**

| Formatted Alignments                                                              |     |                                                                                   |
|-----------------------------------------------------------------------------------|-----|-----------------------------------------------------------------------------------|
| Demodex 18S-1.1                                                                   | 1   | CAAGGAAGGCAGCAGGCACGCAAAATTACCCACTCTCAGAACGAGGAGGTAGTGACGAAAAATAACAATACGGGACTATTA |
| Demodex 18S-2.1                                                                   | 1   | CAAGGAAGGCAGCAGGCACGCAAAATTACCCACTCTCAGAACGAGGAGGTAGTGACGAAAAATAACAATACGGGACTATTA |
| Demodex 18S-3.1                                                                   | 1   | CAAGGAAGGCAGCAGGCACGCAAAATTACCCACTCTCAGAACGAGGAGGTAGTGACGAAAAATAACAATACGGGACTATTA |
| Demodex muscui 18S                                                                | 1   | CAAGGAAGGCAGCAGGCACGCAAAATTACCCACTCTCAGAACGAGGAGGTAGTGACGAAAAATAACAATACGGGACTATTA |
| Demodex folliculorum 18S                                                          | 1   | CAAGGAAGGCAGCAGGCACGCAAAATTACCCACTCTCAGAACGAGGAGGTAGTGACGAAAAATAACAATACGGGACTATTA |
| Demodex brevis 18S                                                                | 1   | CAAGGAAGGCAGCAGGCACGCAAAATTACCCACTCTCAGAACGAGGAGGTAGTGACGAAAAATAACAATACGGGACTATTA |
| Demodex canis 18S                                                                 | 1   | CAAGGAAGGCAGCAGGCACGCAAAATTACCCACTCTCAGAACGAGGAGGTAGTGACGAAAAATAACAATACGGGACTATTA |
| CAAGGAAGGCAGCAGGCACGCAAAATTACCCACTCTCAGAACGAGGAGGTAGTGACGAAAAATAACAATACGGGACTATTA |     |                                                                                   |
| Demodex 18S-1.1                                                                   | 81  | ATAGGCCCCGTAATTGGAATGAGTACAATATAAATCCTTTAACGAGGATCTATTGGAGGGCAAGTCTGGTGCCAGCAGCC  |
| Demodex 18S-2.1                                                                   | 81  | ATAGGCCCCGTAATTGGAATGAGTACAATATAAATCCTTTAACGAGGATCTATTGGAGGGCAAGTCTGGTGCCAGCAGCC  |
| Demodex 18S-3.1                                                                   | 81  | ATAGGCCCCGTAATTGGAATGAGTACAATATAAATCCTTTAACGAGGATCTATTGGAGGGCAAGTCTGGTGCCAGCAGCC  |
| Demodex muscui 18S                                                                | 81  | ATAGGCCCCGTAATTGGAATGAGTACAATATAAATCCTTTAACGAGGATCTATTGGAGGGCAAGTCTGGTGCCAGCAGCC  |
| Demodex folliculorum 18S                                                          | 81  | ATAGGCCCCGTAATTGGAATGAGTACAATATAAATCCTTTAACGAGGATCTATTGGAGGGCAAGTCTGGTGCCAGCAGCC  |
| Demodex brevis 18S                                                                | 81  | ATAGGCCCCGTAATTGGAATGAGTACAATATAAATCCTTTAACGAGGATCTATTGGAGGGCAAGTCTGGTGCCAGCAGCC  |
| Demodex canis 18S                                                                 | 81  | ATAGGCCCCGTAATTGGAATGAGTACAATATAAATCCTTTAACGAGGATCTATTGGAGGGCAAGTCTGGTGCCAGCAGCC  |
| ATAGGCCCCGTAATTGGAATGAGTACAATATAAATCCTTTAACGAGGATCTATTGGAGGGCAAGTCTGGTGCCAGCAGCC  |     |                                                                                   |
| Demodex 18S-1.1                                                                   | 161 | GCGGTAATTCAGCTCCAATAGCGTATATTAAGTTGCTGCGTTTAAAAAGCTCGTAGTTGTATCTCAGTTTCATGTCAAT   |
| Demodex 18S-2.1                                                                   | 161 | GCGGTAATTCAGCTCCAATAGCGTATATTAAGTTGCTGCGTTTAAAAAGCTCGTAGTTGTATCTCAGTTTCATGTCAAT   |
| Demodex 18S-3.1                                                                   | 161 | GCGGTAATTCAGCTCCAATAGCGTATATTAAGTTGCTGCGTTTAAAAAGCTCGTAGTTGTATCTCAGTTTCATGTCAAT   |
| Demodex muscui 18S                                                                | 161 | GCGGTAATTCAGCTCCAATAGCGTATATTAAGTTGCTGCGTTTAAAAAGCTCGTAGTTGTATCTCAGTTTCATGTCAAT   |
| Demodex folliculorum 18S                                                          | 161 | GCGGTAATTCAGCTCCAATAGCGTATATTAAGTTGCTGCGTTTAAAAAGCTCGTAGTTGTATCTCAGTTTCATGTCAAT   |
| Demodex brevis 18S                                                                | 161 | GCGGTAATTCAGCTCCAATAGCGTATATTAAGTTGCTGCGTTTAAAAAGCTCGTAGTTGTATCTCAGTTTCATGTCAAT   |
| Demodex canis 18S                                                                 | 161 | GCGGTAATTCAGCTCCAATAGCGTATATTAAGTTGCTGCGTTTAAAAAGCTCGTAGTTGTATCTCAGTTTCATGTCAAT   |
| GCGGTAATTCAGCTCCAATAGCGTATATTAAGTTGCTGCGTTTAAAAAGCTCGTAGTTGTATCTCAGTTTCATGTCAAT   |     |                                                                                   |
| Demodex 18S-1.1                                                                   | 241 | TGGTCAACCACCTTATTAGTGATTACTTTTGGACTGAACATTGAACCGATTTGTTTCTGATGCTCTTTACCGAGTGTTAT  |
| Demodex 18S-2.1                                                                   | 241 | TGGTCAACCACCTTATTAGTGATTACTTTTGGACTGAACATTGAACCGATTTGTTTCTGATGCTCTTTACCGAGTGTTAT  |
| Demodex 18S-3.1                                                                   | 241 | TGGTCAACCACCTTATTAGTGATTACTTTTGGACTGAACATTGAACCGATTTGTTTCTGATGCTCTTTACCGAGTGTTAT  |
| Demodex muscui 18S                                                                | 241 | TGGTCAACCACCTTATTAGTGATTACTTTTGGACTGAACATTGAACCGATTTGTTTCTGATGCTCTTTACCGAGTGTTAT  |
| Demodex folliculorum 18S                                                          | 241 | TGGTCAACCACCTTATTAGTGATTACTTTTGGACTGAACATTGAACCGATTTGTTTCTGATGCTCTTTACCGAGTGTTAT  |
| Demodex brevis 18S                                                                | 241 | TGGTCAACCACCTTATTAGTGATTACTTTTGGACTGAACATTGAACCGATTTGTTTCTGATGCTCTTTACCGAGTGTTAT  |
| Demodex canis 18S                                                                 | 241 | TGGTCAACCACCTTATTAGTGATTACTTTTGGACTGAACATTGAACCGATTTGTTTCTGATGCTCTTTACCGAGTGTTAT  |
| TGGTCAACCACCTTATTAGTGATTACTTTTGGACTGAACATTGAACCGATTTGTTTCTGATGCTCTTTACCGAGTGTTAT  |     |                                                                                   |
| Demodex 18S-1.1                                                                   | 321 | TAACGA-TCGGGATCTTTACTTTGAAAAAATAGAGTGCTCAAAGCAGGCATTTCGCCTAAATATTCTTGCATGGAATAA   |
| Demodex 18S-2.1                                                                   | 321 | TAACGA-TCGGGATCTTTACTTTGAAAAAATAGAGTGCTCAAAGCAGGCATTTCGCCTAAATATTCTTGCATGGAATAA   |
| Demodex 18S-3.1                                                                   | 321 | TAACGA-TCGGGATCTTTACTTTGAAAAAATAGAGTGCTCAAAGCAGGCATTTCGCCTAAATATTCTTGCATGGAATAA   |
| Demodex muscui 18S                                                                | 321 | TAACGA-TCGGGATCTTTACTTTGAAAAAATAGAGTGCTCAAAGCAGGCATTTCGCCTAAATATTCTTGCATGGAATAA   |
| Demodex folliculorum 18S                                                          | 321 | TAACGA-TCGGGATCTTTACTTTGAAAAAATAGAGTGCTCAAAGCAGGCATTTCGCCTAAATATTCTTGCATGGAATAA   |
| Demodex brevis 18S                                                                | 321 | TAACGA-TCGGGATCTTTACTTTGAAAAAATAGAGTGCTCAAAGCAGGCATTTCGCCTAAATATTCTTGCATGGAATAA   |
| Demodex canis 18S                                                                 | 321 | TAACGA-TCGGGATCTTTACTTTGAAAAAATAGAGTGCTCAAAGCAGGCATTTCGCCTAAATATTCTTGCATGGAATAA   |
| TAACGAATCGGGATCTTTACTTTGAAAAAATAGAGTGCTCAAAGCAGGCATTTCGCCTAAATATTCTTGCATGGAATAA   |     |                                                                                   |
| Demodex 18S-1.1                                                                   | 400 | TGGAATAAGATCTAGGTTCTATTCTGTTGGTCTTTTGAACCTCAGTTAATGATTAAGGACAGACGGGGGCAATTCGTA    |
| Demodex 18S-2.1                                                                   | 400 | TGGAATAAGATCTAGGTTCTATTCTGTTGGTCTTTTGAACCTCAGTTAATGATTAAGGACAGACGGGGGCAATTCGTA    |
| Demodex 18S-3.1                                                                   | 400 | TGGAATAAGATCTAGGTTCTATTCTGTTGGTCTTTTGAACCTCAGTTAATGATTAAGGACAGACGGGGGCAATTCGTA    |
| Demodex muscui 18S                                                                | 400 | TGGAATAAGATCTAGGTTCTATTCTGTTGGTCTTTTGAACCTCAGTTAATGATTAAGGACAGACGGGGGCAATTCGTA    |
| Demodex folliculorum 18S                                                          | 400 | TGGAATAAGATCTAGGTTCTATTCTGTTGGTCTTTTGAACCTCAGTTAATGATTAAGGACAGACGGGGGCAATTCGTA    |
| Demodex brevis 18S                                                                | 400 | TGGAATAAGATCTAGGTTCTATTCTGTTGGTCTTTTGAACCTCAGTTAATGATTAAGGACAGACGGGGGCAATTCGTA    |
| Demodex canis 18S                                                                 | 401 | TGGAATAAGATCTAGGTTCTATTCTGTTGGTCTTTTGAACCTCAGTTAATGATTAAGGACAGACGGGGGCAATTCGTA    |
| TGGAATAAGATCTAGGTTCTATTCTGTTGGTCTTTTGAACCTCAGTTAATGATTAAGGACAGACGGGGGCAATTCGTA    |     |                                                                                   |
| Demodex 18S-1.1                                                                   | 480 | TTGCGGCGCTAGAGGTGAAATTCCTGGACCGTCGCAAGACGAACTACCGC                                |
| Demodex 18S-2.1                                                                   | 480 | TTGCGGCGCTAGAGGTGAAATTCCTGGACCGTCGCAAGACGAACTACCGC                                |
| Demodex 18S-3.1                                                                   | 480 | TTGCGGCGCTAGAGGTGAAATTCCTGGACCGTCGCAAGACGAACTACCGC                                |
| Demodex muscui 18S                                                                | 480 | TTGCGGCGCTAGAGGTGAAATTCCTGGACCGTCGCAAGACGAACTACCGC                                |
| Demodex folliculorum 18S                                                          | 480 | TTGCGGCGCTAGAGGTGAAATTCCTGGACCGTCGCAAGACGAACTACCGC                                |
| Demodex brevis 18S                                                                | 480 | TTGCGGCGCTAGAGGTGAAATTCCTGGACCGTCGCAAGACGAACTACCGC                                |
| Demodex canis 18S                                                                 | 481 | TTGCGGCGCTAGAGGTGAAATTCCTGGACCGTCGCAAGACGAACTACCGC                                |
| TTGCGGCGCTAGAGGTGAAATTCCTGGACCGTCGCAAGACGAACTACCGC                                |     |                                                                                   |

Alignments of putative *Demodex spp.* 18S rRNA gene amplicon sequences obtained from 3 affected mice (one representative for each sample) with the corresponding sequences of *Demodex muscui* (GenBank #JF834894), *Demodex folliculorum* (GenBank #KY922187), *Demodex brevis* (GenBank JN885466.1), and *Demodex canis* (GenBank JN885468.1). Single nucleotide sequence which differs from the *Demodex muscui* reference is highlighted and the consensus sequence is also shown.

**Table S2. List of antibodies used for flow cytometry and immunofluorescence, related to STAR Methods.**

| Company        | Catalog Number | Antibody Name                                                                          | Clone                   | Dilution |
|----------------|----------------|----------------------------------------------------------------------------------------|-------------------------|----------|
| BioLegend      | 115549         | Brilliant Violet 421™ anti-mouse CD19 Antibody, 50 µg                                  | 6D5                     | 1:300    |
| BioLegend      | 116234         | Brilliant Violet 421™ anti-mouse TER-119/Erythroid Cells Antibody, 50 µg               | TER-119                 | 1:300    |
| BioLegend      | 108445         | Brilliant Violet 421™ anti-mouse Ly-6G/Ly-6C (Gr-1) Antibody, 50 µg                    | RB6-8C5                 | 1:300    |
| BioLegend      | 101236         | Brilliant Violet 421™ anti-mouse/human CD11b Antibody, 500ul                           | M1/70                   | 1:300    |
| BioLegend      | 101259         | Brilliant Violet 650™ anti-mouse/human CD11b Antibody                                  | M1/70                   | 1:300    |
| BioLegend      | 117322         | Pacific Blue™ anti-mouse CD11c Antibody, 100 µg                                        | N418                    | 1:300    |
| BioLegend      | 108918         | Pacific Blue™ anti-mouse CD49b (pan-NK cells) Antibody, 100 µg                         | DX5                     | 1:300    |
| BioLegend      | 137612         | Brilliant Violet 421™ anti-mouse CD335 (NKp46) Antibody, 50 µg                         | 29A1.4                  | 1:300    |
| BioLegend      | 108741         | Brilliant Violet 421™ anti-mouse NK-1.1 Antibody, 50 µg                                | PK136                   | 1:300    |
| BioLegend      | 118120         | Brilliant Violet 421™ anti-mouse TCR γ/δ Antibody, 50 µg                               | GL3                     | 1:500    |
| BioLegend      | 134314         | Pacific Blue™ anti-mouse FcεRIα Antibody, 100 µg                                       | MAR-1                   | 1:300    |
| BioLegend      | 100220         | PE/Cy7 anti-mouse CD3 Antibody, 100 µg                                                 | 17A2                    | 1:200    |
| BioLegend      | 123124         | Pacific Blue™ anti-mouse F4/80 Antibody, 100 µg                                        | BM8                     | 1:300    |
| BioLegend      | 103147         | Brilliant Violet 711™ anti-mouse CD45 Antibody, 50 µg                                  | 30-F11                  | 1:300    |
| BD Biosciences | 564279         | BUV395 Rat Anti-Mouse CD45, 50 µg                                                      | 30-F11                  | 1:300    |
| BioLegend      | 103116         | APC/Cyanine7 anti-mouse CD45 Antibody, 100 µg                                          | 30-F11                  | 1:400    |
| BioLegend      | 105331         | Brilliant Violet 785™ anti-mouse CD90.2 Antibody, 50 µg                                | 30-H12                  | 1:1000   |
| BioLegend      | 105343         | Brilliant Violet 605™ anti-mouse CD90.2 Antibody                                       | 30-H12                  | 1:1000   |
| BioLegend      | 100550         | Brilliant Violet 711™ anti-mouse CD4 Antibody, 500 µl                                  | RM4-5                   | 1:200    |
| BioLegend      | 100725         | Pacific Blue™ anti-mouse CD8a Antibody, 100 µg                                         | 53-6.7                  | 1:200    |
| BioLegend      | 100750         | Brilliant Violet 785™ anti-mouse CD8a Antibody                                         | 53-6.7                  | 1:200    |
| BioLegend      | 100642         | Pacific Blue™ anti-mouse CD5 Antibody                                                  | 53-7.3                  | 1:300    |
| BioLegend      | 108133         | Brilliant Violet 605™ anti-mouse Ly-6A/E (Sca-1) Antibody, 125 µL                      | D7                      | 1:300    |
| BioLegend      | 107643         | Brilliant Violet 711™ anti-mouse I-A/I-E Antibody                                      | M5/114.15.2             | 1:400    |
| BioLegend      | 118220         | PerCP/Cyanine5.5 anti-mouse CD326 (Ep-CAM) Antibody                                    | G8.8                    | 1:300    |
| BioLegend      | 313606         | FITC anti-human/mouse CD49f Antibody                                                   | GoH3                    | 1:300    |
| BioLegend      | 313622         | PE/Cyanine7 anti-human/mouse CD49f Antibody                                            | GoH3                    | 1:300    |
| BD Biosciences | 560230         | Alexa Fluor® 647 Rat anti-Mouse CD34                                                   | RAM34                   | 1:200    |
| Invitrogen     | 47-1271-82     | CD127 (IL-7R) Monoclonal Antibody (A7R34), APC-eFluor 780                              | A7R34                   | 1:100    |
| Invitrogen     | 50-9966-42     | Gata-3 Monoclonal Antibody (TWAJ), eFluor 660, eBioscience™, 100 tests                 | TWAJ                    | 1:25     |
| BioLegend      | 300514         | APC anti-human CD4 Antibody                                                            | RPA-T4                  | 1:20     |
| Invitrogen     | 11-5773-82     | FOXP3 Monoclonal Antibody (FJK-16s), eBioscience™                                      | FJK-16s                 | 1:100    |
| BD Biosciences | 745257         | BV605 Rat Anti-Mouse IL-33R (ST2) , 50 µg                                              | U29-93                  | 1:200    |
| Invitrogen     | 46-5183-82     | CD218a (IL-18Ra) Monoclonal Antibody (P3TUNYA), PerCP-eFluor 710, eBioscience™, 100 µg | P3TUNYA                 | 1:300    |
| TakaraBio      | 632496         | Living Colors® DsRed Polyclonal Antibody (100 µl)                                      | Polyclonal, Lot 1904182 | 1:500    |
| Invitrogen     | 11-5698-82     | Ki-67 Monoclonal Antibody (SolA15), FITC, eBioscience™                                 | SolA15                  | 1:100    |
| BD Biosciences | 612131         | FITC Mouse Anti- E-Cadherin                                                            | Clone 36                | 1:400    |
| Invitrogen     | A-21428        | Goat anti-Rabbit IgG (H+L) Cross-Adsorbed Secondary Antibody, Alexa Fluor 555          | Polyclonal, Lot 2011559 | 1:1000   |

**Table S3. List of antibodies used for the CyTOF experiment, related to STAR Methods.**

| Channel | Metal | Antigen       | Conc. Stock<br>( $\mu\text{g/ml}$ ) | Clone       | Vendor                    |
|---------|-------|---------------|-------------------------------------|-------------|---------------------------|
| 113     | In    | Ter119        | 0.4                                 | TER119      | BioLegend                 |
| 115     | In    | CD45          | 0.5                                 | 30-F11      | BioLegend                 |
| 139     | La    | pSTAT3        | 3                                   | 49          | BD Biosciences            |
| 140     | Ce    | CD326         | 0.5                                 | G8.8        | BioLegend                 |
| 141     | Pr    | CD11b         | 0.5                                 | M1/70       | BioLegend                 |
| 142     | Nd    | pH-H3         | 0.5                                 | HTA28       | Abcam                     |
| 143     | Nd    | CD11c         | 0.2                                 | HL3         | BD Biosciences            |
| 144     | Nd    | pMAPKAPK2     | 1.5                                 | 27B7        | Cell Signaling Technology |
| 145     | Nd    | pCREB         | 4                                   | 87G3        | Cell Signaling Technology |
| 146     | Nd    | pPLCg2        | 1                                   | K86-689.37  | BD Biosciences            |
| 147     | Sm    | pSTAT1        | 2.5                                 | 4a          | BD Biosciences            |
| 148     | Nd    | Myc           | 0.2                                 | 9E10        | Fluidigm                  |
| 149     | Sm    | pSTAT5        | 3                                   | 47          | BD Biosciences            |
| 150     | Nd    | pS6           | 7                                   | 2F9         | Cell Signaling Technology |
| 151     | Eu    | Ly6C          | 0.5                                 | HK1.4       | BioLegend                 |
| 152     | Sm    | pErk1/2       | 10                                  | D13.14.4E   | Cell Signaling Technology |
| 153     | Eu    | CyclinB1-153  | 0.2                                 | GNS-1       | Fluidigm                  |
| 154     | Sm    | p-p38         | 3                                   | 36/p38      | BD Biosciences            |
| 155     | Gd    | CD8           | 0.2                                 | 53-6.7      | BioLegend                 |
| 156     | Gd    | CD4           | 0.5                                 | RM4-5       | Biolegend                 |
| 157     | Gd    | CD3           | 0.5                                 | 17A2        | BD Biosciences            |
| 158     | Gd    | Ly6G          | 0.5                                 | 1A8         | BioLegend                 |
| 159     | Tb    | p4EBP1        | 1                                   | 236B4       | Cell Signaling Technology |
| 160     | Gd    | pSyk/ZAP70    | 1.25                                | 17a         | BD Biosciences            |
| 161     | Dy    | pTBK1         | 6                                   | D52C2       | Cell Signaling Technology |
| 162     | Dy    | TCRgd         | 0.853                               | GL3         | BioLegend                 |
| 163     | Dy    | I $\kappa$ Ba | 3                                   | L35A5       | Cell Signaling Technology |
| 164     | Dy    | AFP-1         | 0.2                                 | SPM334      | Novus                     |
| 165     | Ho    | pSTAT6        | 3                                   | 18          | BD Biosciences            |
| 166     | Er    | pRB           | 0.2                                 | J112906     | Fluidigm                  |
| 167     | Er    | Foxp3         | 5                                   | NRRF-30     | eBioscience               |
| 168     | Er    | NK1.1         | 0.5                                 | PK136       | BioLegend                 |
| 169     | Tm    | Ki67          | 2                                   | SolA15      | eBioscience               |
| 170     | Er    | pSTAT4        | 3                                   | 38          | BD Biosciences            |
| 171     | Yb    | CD62L         | 5                                   | MEL-14      | BioLegend                 |
| 172     | Yb    | SiglecF       | 0.5                                 | E50-2440    | BD Biosciences            |
| 173     | Yb    | CD19          | 0.5                                 | 6D5         | BioLegend                 |
| 174     | Yb    | CD34          | 0.2                                 | RAM34       | BD Biosciences            |
| 175     | Lu    | CD44          | 0.5                                 | IM7         | BD Biosciences            |
| 209     | Bi    | MHC II        | 0.5                                 | M5/114.15.2 | BioLegend                 |

**Table S4. Patient sample characteristics, related to STAR Methods.**

| <b>Sample</b> | <b>Diagnosis</b> | <b>Age</b> | <b>Sex</b> | <b>Location</b> | <b>Reason for tissue</b> |
|---------------|------------------|------------|------------|-----------------|--------------------------|
| 1             | Rhinophyma       | 70         | M          | nose            | Rhinophyma excision      |
| 2             | Rhinophyma       | 47         | M          | nose            | Rhinophyma excision      |
| 3             | Rhinophyma       | 68         | M          | nose            | Rhinophyma excision      |
| 4             | Rhinophyma       | 62         | M          | nose            | Rhinophyma excision      |
| 5             | Rhinophyma       | 62         | M          | nose            | Rhinophyma excision      |
| 6             | Rhinophyma       | 63         | M          | nose            | Rhinophyma excision      |
| 7             | Rhinophyma       | 63         | M          | nose            | Rhinophyma excision      |
| 8             | Rhinophyma       | 59         | M          | nose            | Rhinophyma excision      |
| 9             | Normal           | 78         | M          | nose            | BCC excision             |
| 10            | Normal           | 65         | F          | nose            | BCC excision             |
| 11            | Normal           | 66         | F          | nose            | BCC excision             |
| 12            | Normal           | 65         | M          | nose            | MIS excision             |
| 13            | Normal           | 59         | F          | nose            | MIS excision             |
| 14            | Normal           | 65         | F          | nose            | MIS excision             |
| 15            | Normal           | 57         | F          | nose            | Nevus excision           |
| 16            | Normal           | 75         | M          | nose            | BCC excision             |

Note: Normal skin was obtained from the tips of elliptical excisions. Cases were selected where normal skin in the tips, well away from the reason for the excision, was available.
